# Supplementary material
Source: Research Square preprint supplement (doi:10.21203/rs.3.rs-9269383/v1)

**Figure 1**

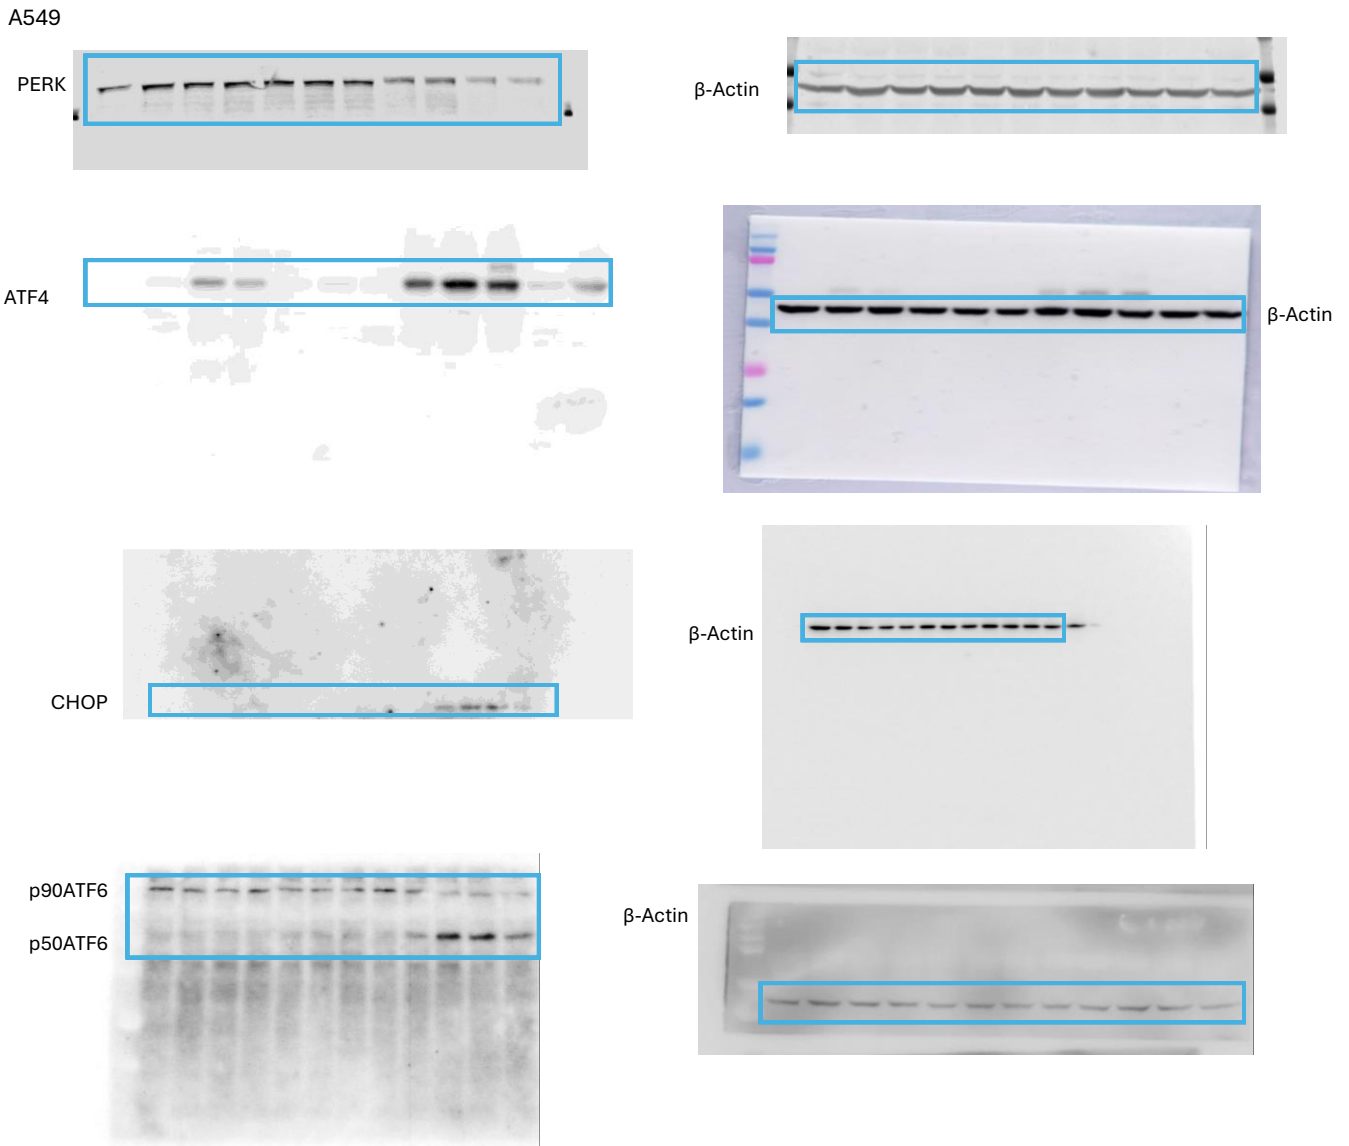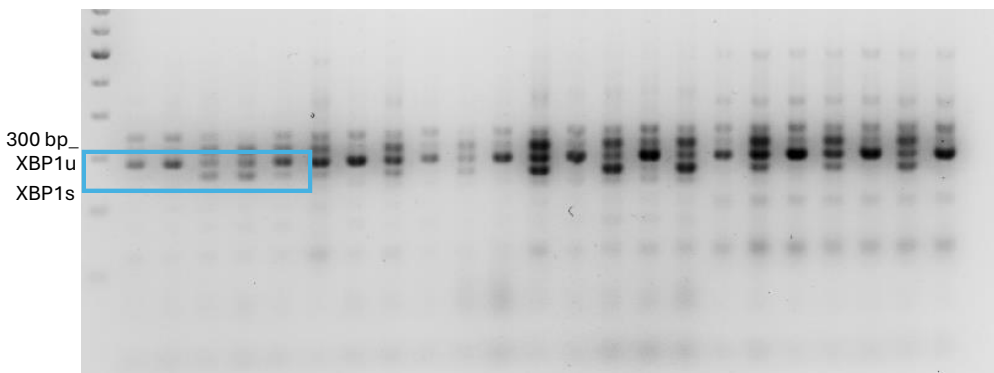

**Figure S1**

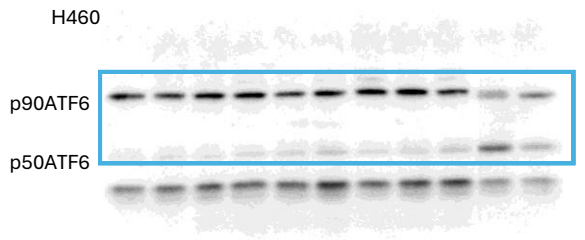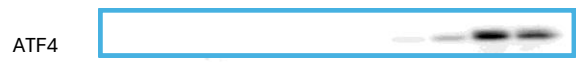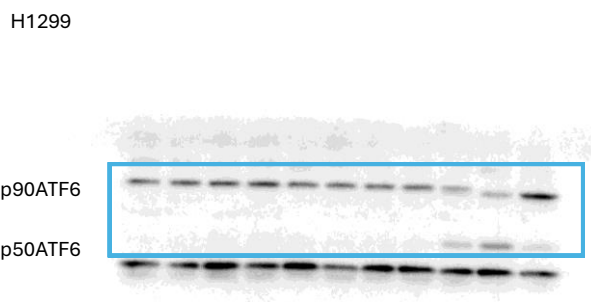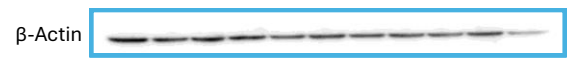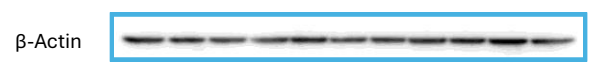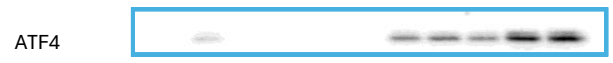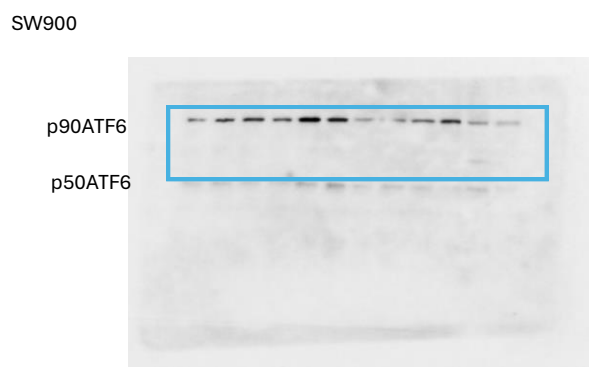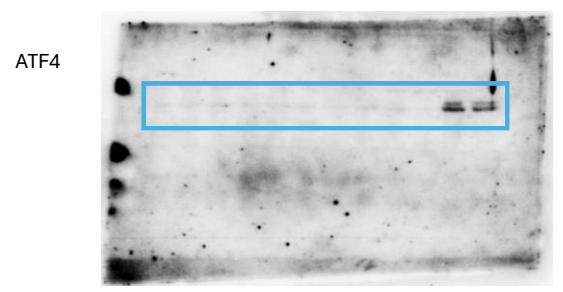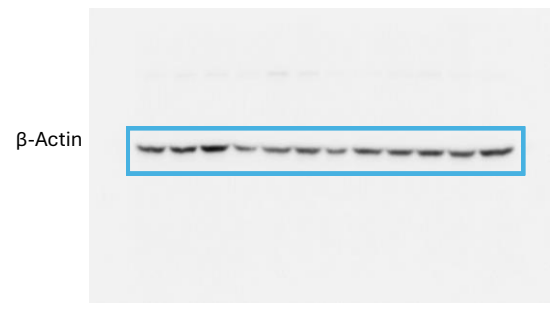

**Figure 2**

A549

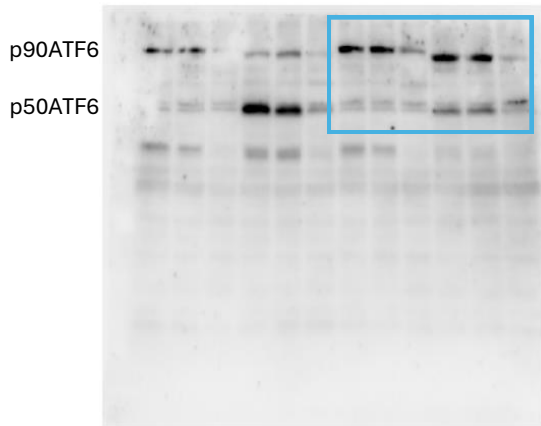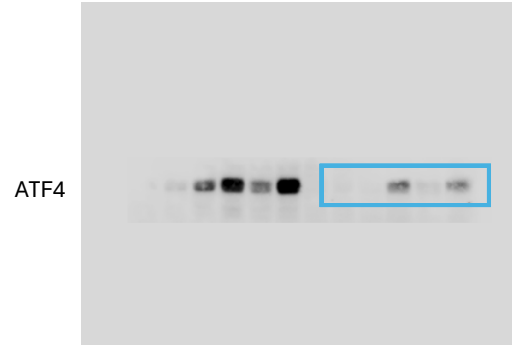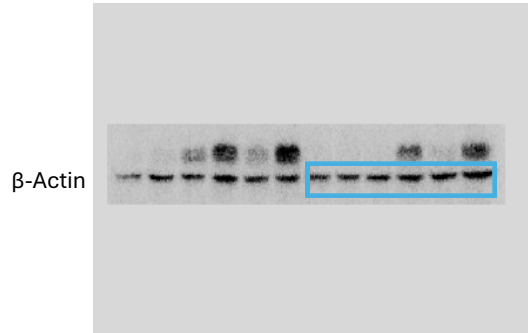

**Figure S3**

A549

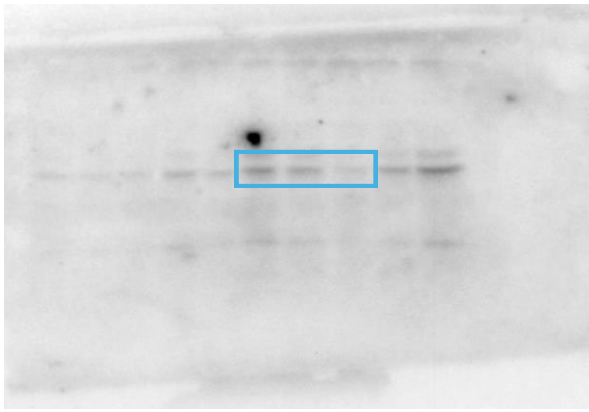

DR5

$\beta$ -actin

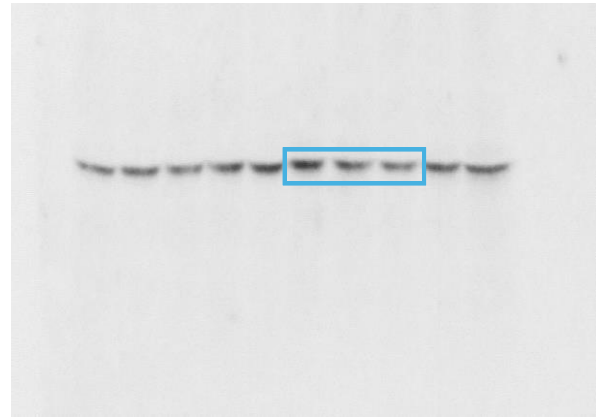

DR4

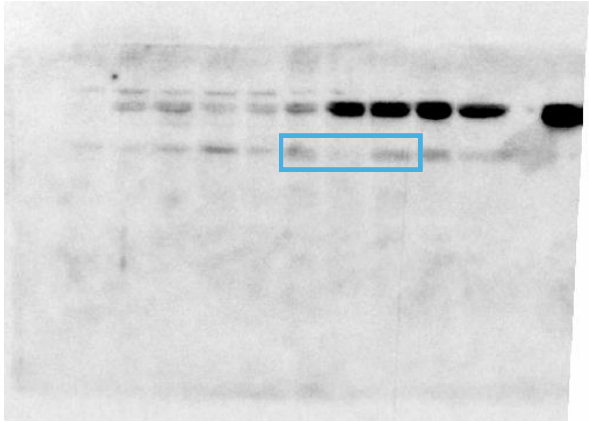

$\beta$ -actin

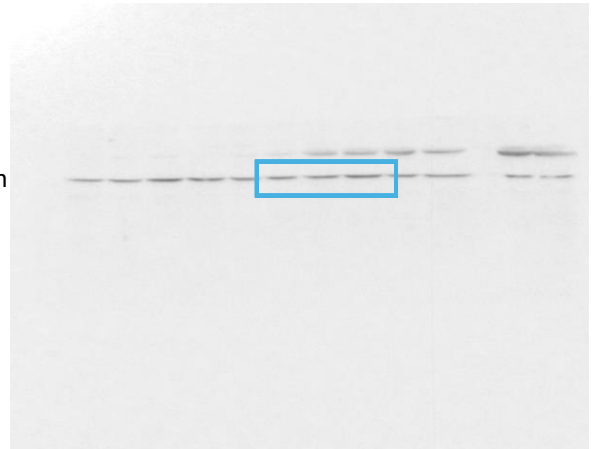

**Figure 4**

A549 6h

A549 16h

CHOP

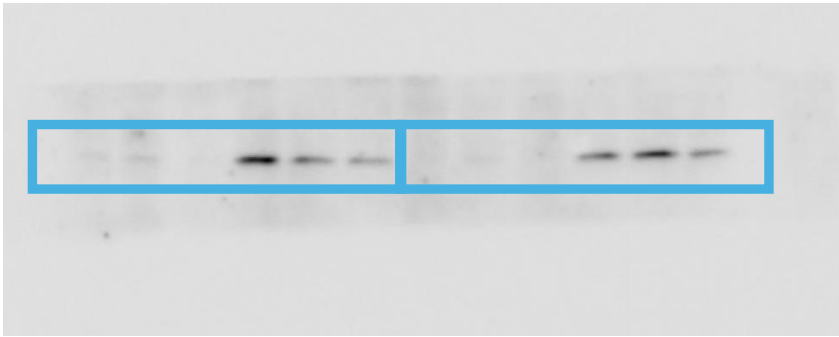

$\beta$ -Actin

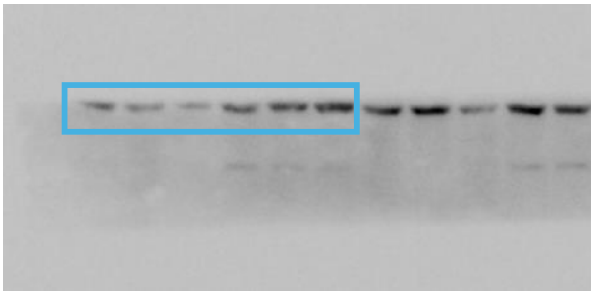

Tubulin

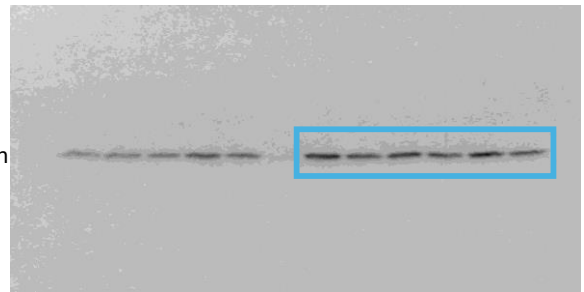

**Figure 5**

A459

NOXA

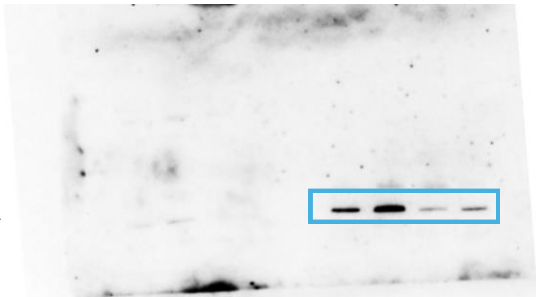

$\beta$ -Actin

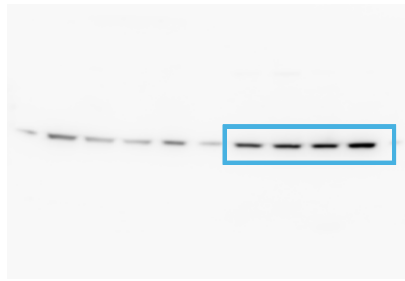

DR5

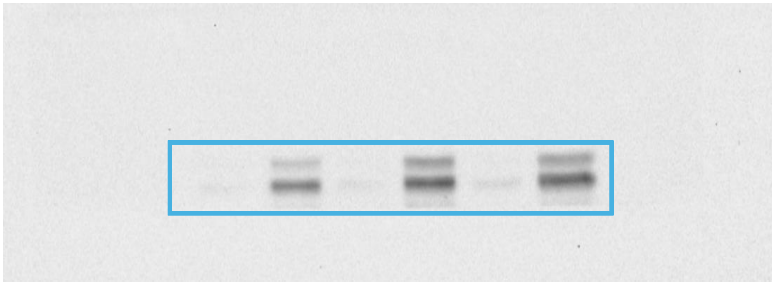

DR4

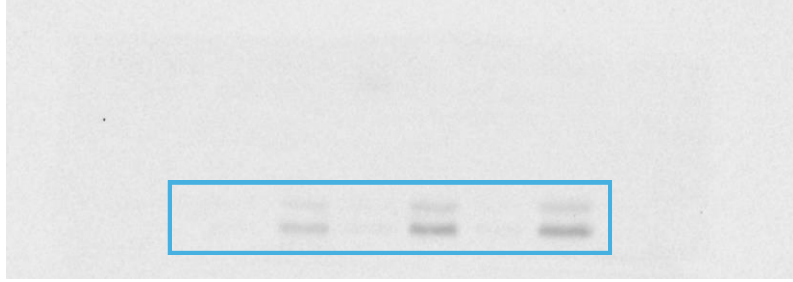

$\beta$ -Actin

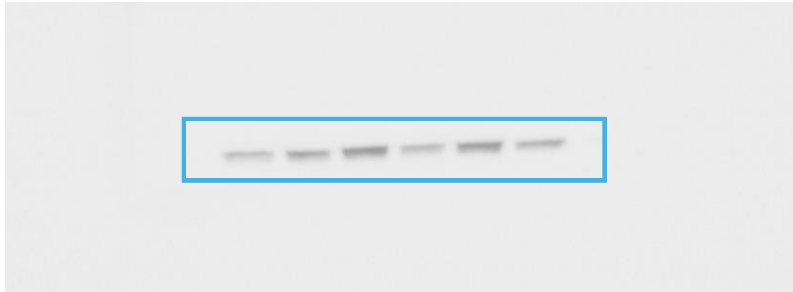

**Figure 7**

A459

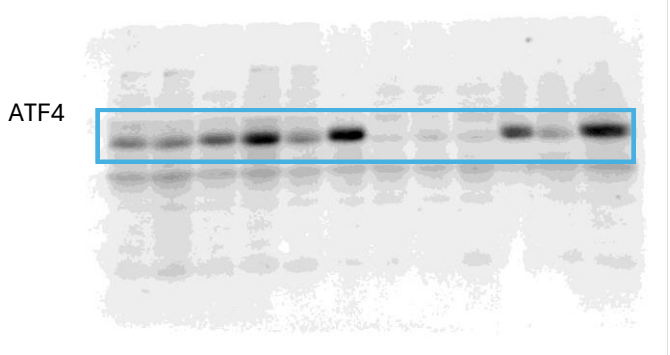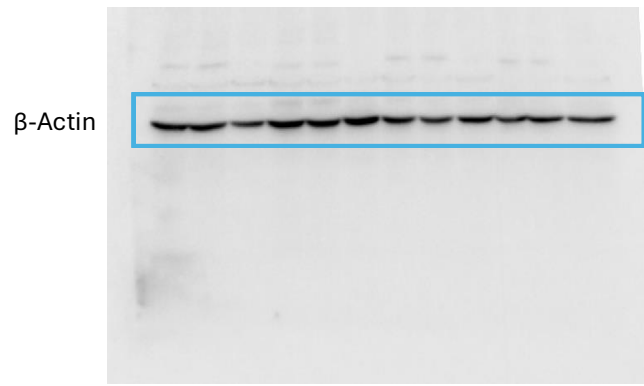

Supplement: Supplementary file 2 [file 8cf7bf0ba4cfb2df49b5e449.pdf]
