# Supplementary material
Source: Research Square preprint supplement (doi:10.21203/rs.3.rs-9269383/v1)
Supplement: Supplementary file 1 [file 0a033074f7dd5f1c19b410c4.docx]

**Supplemental data**

**Supplementary file 1:** Reactome pathways significantly regulated when comparing glucose-deprived versus glucose-rich incubation (“+Glc”, columns), or when comparing an siRNA versus the NT siRNA in glucose-deprived cells (“ATF4” and “ATF6” columns). Cells were collected after 6 or 16h of glucose deprivation.

**Supplementary file 2:** Differentially expressed genes (*p*-value (padj) < 0.05) when comparing incubation in glucose-deprived versus glucose-rich conditions (“Glc”, columns), or siRNAs versus NT siRNA in glucose-deprived cells (“ATF4” and “ATF6” columns) after 16h of glucose deprivation.

**Supplementary table 1:** Antibodies, siRNA and primer sequences

**Supplementary material 1:** Full membrane western blot images.
